# Supplementary material for: Transcriptional Networks Controlling the Cell Cycle
Source: PubMed Central journal article supplement (PMC3538345; doi:10.1534/g3.112.004283), 2013-01-01
Supplement: supp_3.1.75_FigureS7.pdf [file supp_3.1.75_FigureS7.pdf]

A

|             |      |          |            |             |
|-------------|------|----------|------------|-------------|
| Myt1        | 1    |          |            |             |
| Mapk-Ak2    | 0    | 2        |            |             |
| Pan (dTcf)  | 0    | 0        | 64         |             |
| Lic (dMEK2) | 0    | 1        | 0          | 6           |
|             | Myt1 | Mapk-Ak2 | Pan (dTcf) | Lic (dMEK2) |

B

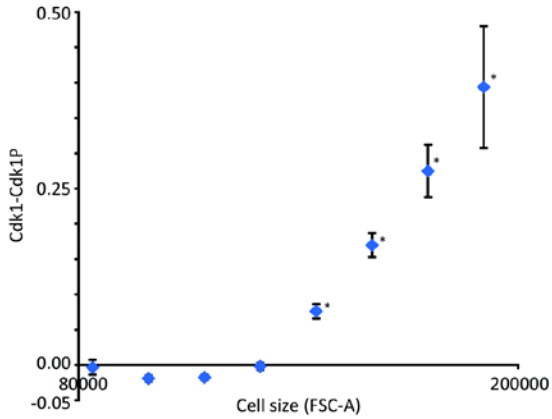

**Figure S7** (A) Overlap between target genes of *Myt1*, *MAPK-Ak2*, *Pan/dTCF* and *Lic/MEK3*. Numbers indicate shared target genes. Note that no target gene is common to all of these samples. (B) Relative amount of unphosphorylated Cdk1, Cdk1-Cdk1P in *Drosophila S2* cells as a function of cell size, FSC-A). Note that unphosphorylated Cdk1 rapidly increases after the G2 cells reach a certain size. Error bars indicate one standard error, and asterisks  $p < 0.01$ , Kolmogorov-Smirnov test).
